# Supplementary material for: A diagnostic interface for the ICOsahedral Non-hydrostatic (ICON) modelling framework based on the Modular Earth Submodel System (MESSy v2.50)
Source: Copernicus journal article supplement (doi:10.5194/gmd-9-3639-2016), 2016-10-13
Supplement: Supplementary file [file gmd-9-3639-2016-supplement-title-page.pdf › gmd-9-3639-2016-supplement-title-page.pdf]

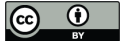

## *Supplement of*

# **A diagnostic interface for the ICOSahedral Non-hydrostatic (ICON) modelling framework based on the Modular Earth Submodel System (MESSy v2.50)**

**Bastian Kern and Patrick Jöckel**

*Correspondence to:* Bastian Kern ([bastian.kern@dlr.de](mailto:bastian.kern@dlr.de))

- [gmd-9-3639-2016-supplement-title-page.pdf](#)
- [channel-manual.pdf](#)
- [gragg-manual.pdf](#)
- [kern\\_joeckel\\_supp.pdf](#)
- [qt\\_temp\\_jpdf\\_3\\_panels.jnl](#)
- [temp\\_ave\\_3\\_panels.jnl](#)
- [temp\\_qt\\_regrid\\_lon\\_lat.jnl](#)

The copyright of individual parts of the supplement might differ from the CC-BY 3.0 licence.
